# Supplementary material for: Impact of numeracy on understanding of prostate cancer risk reduction in PSA screening
Source: PubMed Central journal article supplement (PMC5746255; doi:10.1371/journal.pone.0190357), 2017-12-28
Supplement: pone.0190357.s001.pdf [file pone.0190357.s001.pdf]

---

Please answer the following questions.

Questions 1–3 are about probabilities, or the chance that something will happen.

---

**Question 1.**

Imagine that we flip a normal coin 1000 times. How many times would the coin come up heads in 1000 flips?

\_\_\_\_\_ time(s) out of 1000

---

**Question 2.**

In the Big Bucks Lottery, the chance of winning a \$10 prize is 1%. How many people would win a \$10 prize if 1000 people each buy a single ticket to the Big Bucks Lottery?

\_\_\_\_\_ person(s) out of 1000

---

**Question 3.**

In Acme Publishing Sweepstakes, the chance of winning a car is 1 in 1000. What percentage of tickets to Acme Publishing Sweepstakes wins a car?

\_\_\_\_\_ %

---

**Questions 4 and 5 are about a test for prostate cancer.**

PSA screening is a way of testing men for the chances of having prostate cancer. Imagine that a hypothetical study showed that on average, PSA screening reduces the risk of prostate cancer death by about 20%, from a baseline risk of 5 in 1000.

---

**Question 4.**

Imagine 1000 average men. Based on the study results and what you know about prostate cancer, how many will die of prostate cancer if **all of them** receive PSA screening?

\_\_\_\_\_ out of 1000

---

**Question 5.**

Imagine 1000 average men. Based on the study results and what you know about prostate cancer, how many will die of prostate cancer if **none of them** receives PSA screening?

\_\_\_\_\_ out of 1000

---

**Please answer the following questions about yourself.**

---

Age

\_\_\_\_\_ years old

---

Highest level of education that you completed

- Did not finish high school
  - Completed high school
  - Completed college
  - Completed graduate school
- 

Race

- White/Caucasian
  - African-American
  - Hispanic/Latino
  - Asian/Pacific Islander
  - Other
-

---

Employment

- Employed  
 Unemployed  
 Retired

---

Yearly income (now or at time of retirement)

- Less than \$25,000  
 \$25,000 to \$50,000  
 \$50,000 to \$100,000  
 More than \$100,000

---

Have you ever had a PSA (prostate-specific antigen) test?

- Yes    No    Not sure

---

Have you ever had prostate cancer?

- Yes    No

---

Do you think every man should have a PSA test?

- Yes    No    No opinion

---

**When you have finished, please put this survey in the envelope provided.  
Thank you for your participation.**

---

---

Please answer the following questions.

Questions 1–3 are about probabilities, or the chance that something will happen.

---

**Question 1.**

Imagine that we flip a normal coin 1000 times. How many times would the coin come up heads in 1000 flips?

\_\_\_\_\_ time(s) out of 1000

---

**Question 2.**

In the Big Bucks Lottery, the chance of winning a \$10 prize is 1%. How many people would win a \$10 prize if 1000 people each buy a single ticket to the Big Bucks Lottery?

\_\_\_\_\_ person(s) out of 1000

---

**Question 3.**

In Acme Publishing Sweepstakes, the chance of winning a car is 1 in 1000. What percentage of tickets to Acme Publishing Sweepstakes wins a car?

\_\_\_\_\_ %

---

**Questions 4 and 5 are about a test for prostate cancer.**

PSA screening is a way of testing men for the chances of having prostate cancer. Imagine that a hypothetical study showed that on average, PSA screening reduces the risk of prostate cancer death by about 20%.

---

**Question 4.**

Imagine 1000 average men. Based on the study results and what you know about prostate cancer, how many will die of prostate cancer if **all of them** receive PSA screening?

\_\_\_\_\_ out of 1000

---

**Question 5.**

Imagine 1000 average men. Based on the study results and what you know about prostate cancer, how many will die of prostate cancer if **none of them** receives PSA screening?

\_\_\_\_\_ out of 1000

---

**Please answer the following questions about yourself.**

---

Age

\_\_\_\_\_ years old

---

Highest level of education that you completed

- Did not finish high school
  - Completed high school
  - Completed college
  - Completed graduate school
- 

Race

- White/Caucasian
  - African-American
  - Hispanic/Latino
  - Asian/Pacific Islander
  - Other
-

---

Employment

- Employed  
 Unemployed  
 Retired

---

Yearly income (now or at time of retirement)

- Less than \$25,000  
 \$25,000 to \$50,000  
 \$50,000 to \$100,000  
 More than \$100,000

---

Have you ever had a PSA (prostate-specific antigen) test?

- Yes    No    Not sure

---

Have you ever had prostate cancer?

- Yes    No

---

Do you think every man should have a PSA test?

- Yes    No    No opinion

---

**When you have finished, please put this survey in the envelope provided.  
Thank you for your participation.**

---

---

Please answer the following questions.

Questions 1–3 are about probabilities, or the chance that something will happen.

---

**Question 1.**

Imagine that we flip a normal coin 1000 times. How many times would the coin come up heads in 1000 flips?

\_\_\_\_\_ time(s) out of 1000

---

**Question 2.**

In the Big Bucks Lottery, the chance of winning a \$10 prize is 1%. How many people would win a \$10 prize if 1000 people each buy a single ticket to the Big Bucks Lottery?

\_\_\_\_\_ person(s) out of 1000

---

**Question 3.**

In Acme Publishing Sweepstakes, the chance of winning a car is 1 in 1000. What percentage of tickets to Acme Publishing Sweepstakes wins a car?

\_\_\_\_\_ %

---

**Questions 4 and 5 are about a test for prostate cancer.**

PSA screening is a way of testing men for the chances of having prostate cancer. Imagine that a hypothetical study showed that on average, PSA screening reduces the risk of prostate cancer death by about 1 patient in 1000, from a baseline risk of 5 in 1000.

---

**Question 4.**

Imagine 1000 average men. Based on the study results and what you know about prostate cancer, how many will die of prostate cancer if **all of them** receive PSA screening?

\_\_\_\_\_ out of 1000

---

**Question 5.**

Imagine 1000 average men. Based on the study results and what you know about prostate cancer, how many will die of prostate cancer if **none of them** receives PSA screening?

\_\_\_\_\_ out of 1000

---

**Please answer the following questions about yourself.**

---

Age

\_\_\_\_\_ years old

---

Highest level of education that you completed

- Did not finish high school
  - Completed high school
  - Completed college
  - Completed graduate school
- 

Race

- White/Caucasian
  - African-American
  - Hispanic/Latino
  - Asian/Pacific Islander
  - Other
-

---

Employment

- Employed  
 Unemployed  
 Retired

---

Yearly income (now or at time of retirement)

- Less than \$25,000  
 \$25,000 to \$50,000  
 \$50,000 to \$100,000  
 More than \$100,000

---

Have you ever had a PSA (prostate-specific antigen) test?

- Yes    No    Not sure

---

Have you ever had prostate cancer?

- Yes    No

---

Do you think every man should have a PSA test?

- Yes    No    No opinion

---

**When you have finished, please put this survey in the envelope provided.**

**Thank you for your participation.**

---

---

Please answer the following questions.

Questions 1–3 are about probabilities, or the chance that something will happen.

---

**Question 1.**

Imagine that we flip a normal coin 1000 times. How many times would the coin come up heads in 1000 flips? \_\_\_\_\_ time(s) out of 1000

---

**Question 2.**

In the Big Bucks Lottery, the chance of winning a \$10 prize is 1%. How many people would win a \$10 prize if 1000 people each buy a single ticket to the Big Bucks Lottery? \_\_\_\_\_ person(s) out of 1000

---

**Question 3.**

In Acme Publishing Sweepstakes, the chance of winning a car is 1 in 1000. What percentage of tickets to Acme Publishing Sweepstakes wins a car? \_\_\_\_\_ %

---

**Questions 4 and 5 are about a test for prostate cancer.**

PSA screening is a way of testing men for the chances of having prostate cancer. Imagine that a hypothetical study showed that on average, PSA screening reduces the risk of prostate cancer death by about 1 patient in 1000.

---

**Question 4.**

Imagine 1000 average men. Based on the study results and what you know about prostate cancer, how many will die of prostate cancer if **all of them** receive PSA screening? \_\_\_\_\_ out of 1000

---

**Question 5.**

Imagine 1000 average men. Based on the study results and what you know about prostate cancer, how many will die of prostate cancer if **none of them** receives PSA screening? \_\_\_\_\_ out of 1000

---

**Please answer the following questions about yourself.**

---

Age \_\_\_\_\_ years old

---

Highest level of education that you completed

- Did not finish high school
- Completed high school
- Completed college
- Completed graduate school

---

Race

- White/Caucasian
- African-American
- Hispanic/Latino
- Asian/Pacific Islander
- Other

---

---

Employment

- Employed  
 Unemployed  
 Retired

---

Yearly income (now or at time of retirement)

- Less than \$25,000  
 \$25,000 to \$50,000  
 \$50,000 to \$100,000  
 More than \$100,000

---

Have you ever had a PSA (prostate-specific antigen) test?

- Yes    No    Not sure

---

Have you ever had prostate cancer?

- Yes    No

---

Do you think every man should have a PSA test?

- Yes    No    No opinion

---

**When you have finished, please put this survey in the envelope provided.**

**Thank you for your participation.**

---
